# Supplementary material
Source: ML conference proceedings conference paper supplement (https://openreview.net/forum?id=66H4g_OHdnl)
Supplement: supplementary_material [file attachment]

## Code Link:

<https://www.dropbox.com/s/hyf9tr63dgkyoiy/Code.zip?dl=0>
